# Supplementary material for: Controlled release of doxorubicin from gelatin-based nanoparticles: theoretical and experimental approach
Source: Royal Society of Chemistry journal article supplement (doi:10.1039/d3ma00825h), 2024-01-01
Supplement: d3ma00825h1.pdf [file d3ma00825h1.pdf]

## Supporting Information

### **Controlled release of doxorubicin from gelatin-based nanoparticles:**

#### **Theoretical and experimental approach**

Wajiha Fatima<sup>1</sup>, Syeda Rubab Batool<sup>2</sup>, Farwa Mushtaq<sup>2,3</sup>, Muhammad Aslam<sup>1</sup>, Zulfiqar Ali Raza<sup>1\*</sup> and Muhammad Anwaar Nazeer<sup>2\*</sup>

<sup>1</sup>School of Science, National Textile University, Faisalabad 37610, Pakistan.

<sup>2</sup>School of Engineering and Technology, National Textile University, Faisalabad 37610, Pakistan.

<sup>3</sup>School of Nano-Tech and Nano-Bionics, University of Science and Technology of China, Hefei, Anhui 230026, China.

\*Corresponding authors

mnazeer13@ku.edu.tr

zarazapk@yahoo.com

**Table S1.** The experimental data sets used in ANN training and testing include pH, time, and Ge-NPs con. (%) and DOX release rate.

| S. No. | Input parameters |     |          | Output parameter |
|--------|------------------|-----|----------|------------------|
|        | GNPs conc. (%)   | pH  | Time (h) | DOX Release (%)  |
| 1      | 5                | 7.4 | 0        | 0                |
| 2      | 5                | 7.4 | 2        | 2.432            |
| 3      | 5                | 7.4 | 3        | 4.49             |
| 4      | 5                | 7.4 | 4        | 6.364            |
| 5      | 5                | 7.4 | 8        | 15.09            |
| 6      | 5                | 7.4 | 10       | 18.315           |
| 7      | 5                | 7.4 | 24       | 23.493           |
| 8      | 5                | 7.4 | 48       | 24.365           |
| 9      | 5                | 5   | 0        | 0                |
| 10     | 5                | 5   | 2        | 10.432           |
| 11     | 5                | 5   | 3        | 21.49            |
| 12     | 5                | 5   | 4        | 32.364           |
| 13     | 5                | 5   | 8        | 52               |
| 14     | 5                | 5   | 10       | 60.325           |
| 15     | 5                | 5   | 24       | 68.43            |
| 16     | 5                | 5   | 48       | 69.13            |
| 17     | 5                | 3   | 0        | 0                |
| 18     | 5                | 3   | 2        | 19               |
| 19     | 5                | 3   | 3        | 33.249           |
| 20     | 5                | 3   | 4        | 46.364           |
| 21     | 5                | 3   | 8        | 70.09            |
| 22     | 5                | 3   | 10       | 79.315           |
| 23     | 5                | 3   | 24       | 95.493           |
| 24     | 5                | 3   | 48       | 95.43            |
| 25     | 10               | 7.4 | 0        | 0                |
| 26     | 10               | 7.4 | 2        | 2.132            |
| 27     | 10               | 7.4 | 3        | 3.149            |
| 28     | 10               | 7.4 | 4        | 5.364            |
| 29     | 10               | 7.4 | 8        | 10.09            |

|           |    |     |    |        |
|-----------|----|-----|----|--------|
| <b>30</b> | 10 | 7.4 | 10 | 12.315 |
| <b>31</b> | 10 | 7.4 | 24 | 17.493 |
| <b>32</b> | 10 | 7.4 | 48 | 18.365 |
| <b>33</b> | 10 | 5   | 0  | 0      |
| <b>34</b> | 10 | 5   | 2  | 7.432  |
| <b>35</b> | 10 | 5   | 3  | 15.49  |
| <b>36</b> | 10 | 5   | 4  | 22.364 |
| <b>37</b> | 10 | 5   | 8  | 44.898 |
| <b>38</b> | 10 | 5   | 10 | 50.325 |
| <b>39</b> | 10 | 5   | 24 | 55.43  |
| <b>40</b> | 10 | 5   | 48 | 59.13  |
| <b>41</b> | 10 | 3   | 0  | 0      |
| <b>42</b> | 10 | 3   | 2  | 12     |
| <b>43</b> | 10 | 3   | 3  | 27.249 |
| <b>44</b> | 10 | 3   | 4  | 36.364 |
| <b>45</b> | 10 | 3   | 8  | 60.09  |
| <b>46</b> | 10 | 3   | 10 | 69.315 |
| <b>47</b> | 10 | 3   | 24 | 81.493 |
| <b>48</b> | 10 | 3   | 48 | 85.43  |
